# Supplementary material
Source: publisher site journal article supplement (https://www.dovepress.com/article/377789)
Supplement: Supplementary file 1 [file get_supplementary_file.php]

**Supplemental Material**

**Results**

**Alternative Mediation Analysis**

Participants also completed the PROMIS depression at T1 and the UCLA Loneliness Scale at T2. Greater severity of depression (T1) was related to greater feelings of loneliness (T2). An alternative mediation model was tested to investigate whether loneliness after living in the pandemic for one year (T2) mediated the relation between depression during the early weeks of the pandemic (T1) and pain catastrophizing after living in the pandemic for one year (T2). Pain severity and interference, and use of pain medications at T1 were included as covariates. Additionally, T1 catastrophizing was included as a covariate to adjust for how catastrophizing may have changed over time. There was not a significant indirect effect of depression on pain catastrophizing through loneliness (*b* = 0.05, 95% CI [-0.06, .21]). This provided empirical support for the temporal order of the original mediation model with loneliness (T1) as the independent variable and depression (T2) as the mediator variable.
